# Supplementary material for: Reliability of quantitative transverse relaxation time mapping with T2-prepared whole brain pCASL
Source: PubMed Central journal article supplement (PMC7592060; doi:10.1038/s41598-020-74680-y), 2020-10-27
Supplement: 41598_2020_74680_MOESM1_ESM.pdf [file 41598_2020_74680_MOESM1_ESM.pdf]

# **Reliability of Quantitative Transverse Relaxation Time Mapping with T<sub>2</sub>-Prepared Whole Brain pCASL**

Martin Schidlowski<sup>1,2</sup>, Rüdiger Stirnberg<sup>2</sup>, Tony Stöcker<sup>2,3,\*</sup>, Theodor Rüber<sup>1,4,5,\*</sup>

<sup>1</sup>Department of Epileptology, University of Bonn Medical Center, Bonn, Germany

<sup>2</sup>German Center for Neurodegenerative Diseases (DZNE), Bonn, Germany

<sup>3</sup>Department for Physics and Astronomy, University of Bonn, Bonn, Germany

<sup>4</sup>Epilepsy Center Frankfurt Rhine-Main, Department of Neurology, Goethe University Frankfurt, Frankfurt/Main, Germany

<sup>5</sup>Center for Personalized Translational Epilepsy Research (CePTER), Goethe University Frankfurt, Frankfurt/Main, Germany

\*These authors contributed equally to this work.

## Supplementary Figure S1

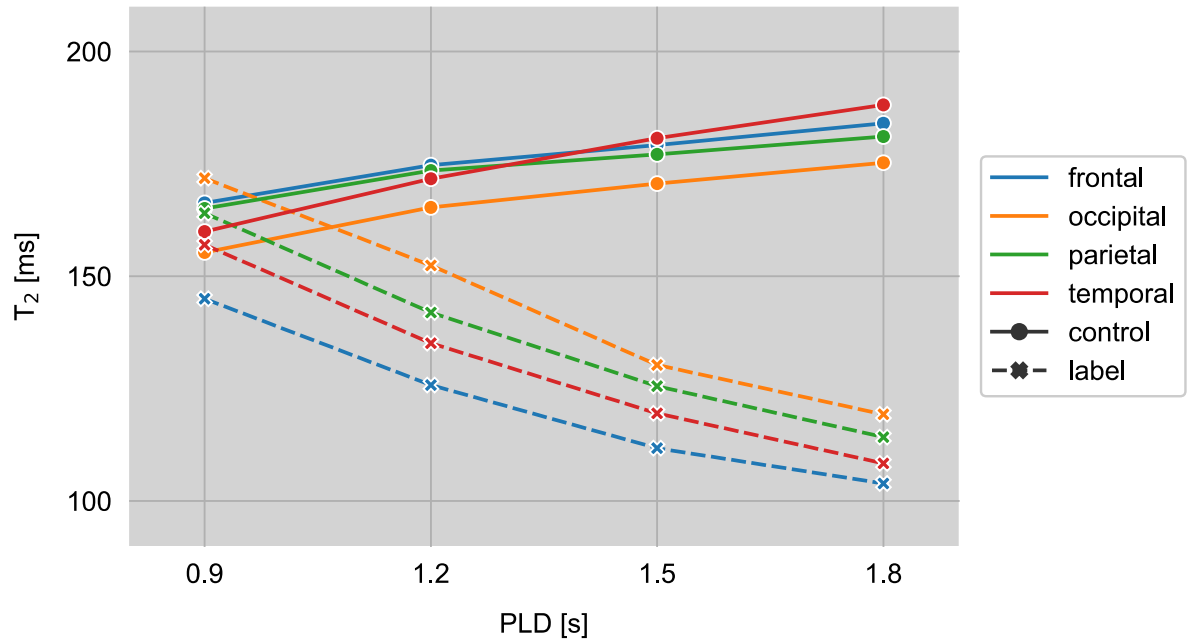

Averaged median T<sub>2</sub> values of perfusion-weighted ASL signal (solid) and ASL control signal (dashed) from repeated measurements of ten subjects at four postlabeling delays PLD=0.9/1.2/1.5/1.8 s in four gray matter regions of interest (ROIs).

## Supplementary Figure S2

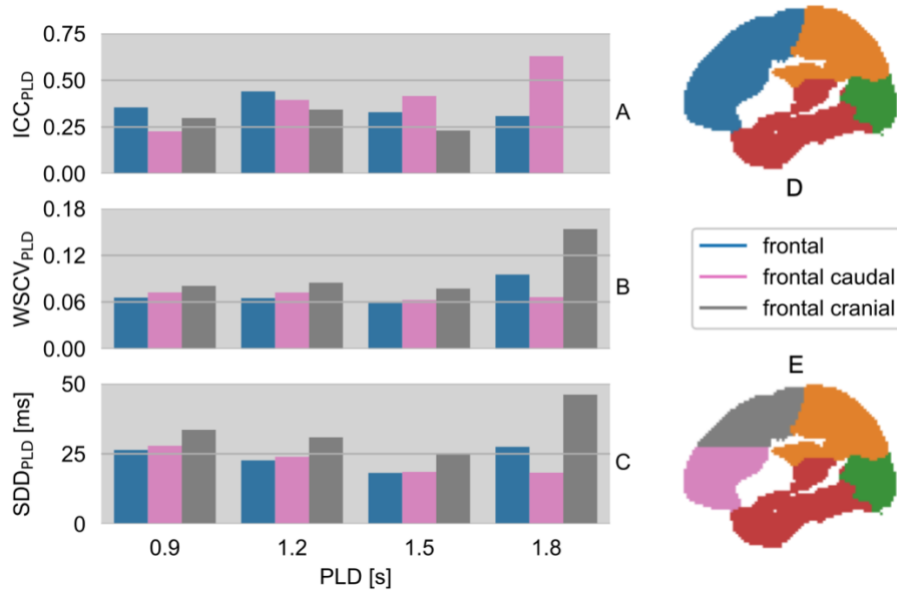

(A) Intraclass correlation coefficient  $ICC_{PLD}$ , (B) within-subject coefficient of variation  $WSCV_{PLD}$  and (C) smallest detectable difference  $SDD_{PLD}$  of median  $T_2$  values from repeated measurements of ten subjects. Results are shown for four postlabeling delays  $PLD=0.9/1.2/1.5/1.8$  s in frontal gray matter regions of interest (ROIs). The frontal ROI (blue in D) corresponds to the region used for the previous statistical analysis. This region was subdivided into a caudal (pink) and a cranial (gray) segment according to (E). The frontal caudal segment, which suffers from susceptibility-induced  $T_2$  reduction, does not yield poor measurement reliability than the large frontal ROI. Interestingly, however, the frontal cranial segment yields a considerably poorer measurement reliability, in particular at longer PLDs. For comparison, the same analysis without the two most unreliable subjects (V, VIII) provides a frontal-cranial  $ICC_{PLD}$  of 0.37 at  $PLD=1.8$  s.

## Supplementary Figure S3

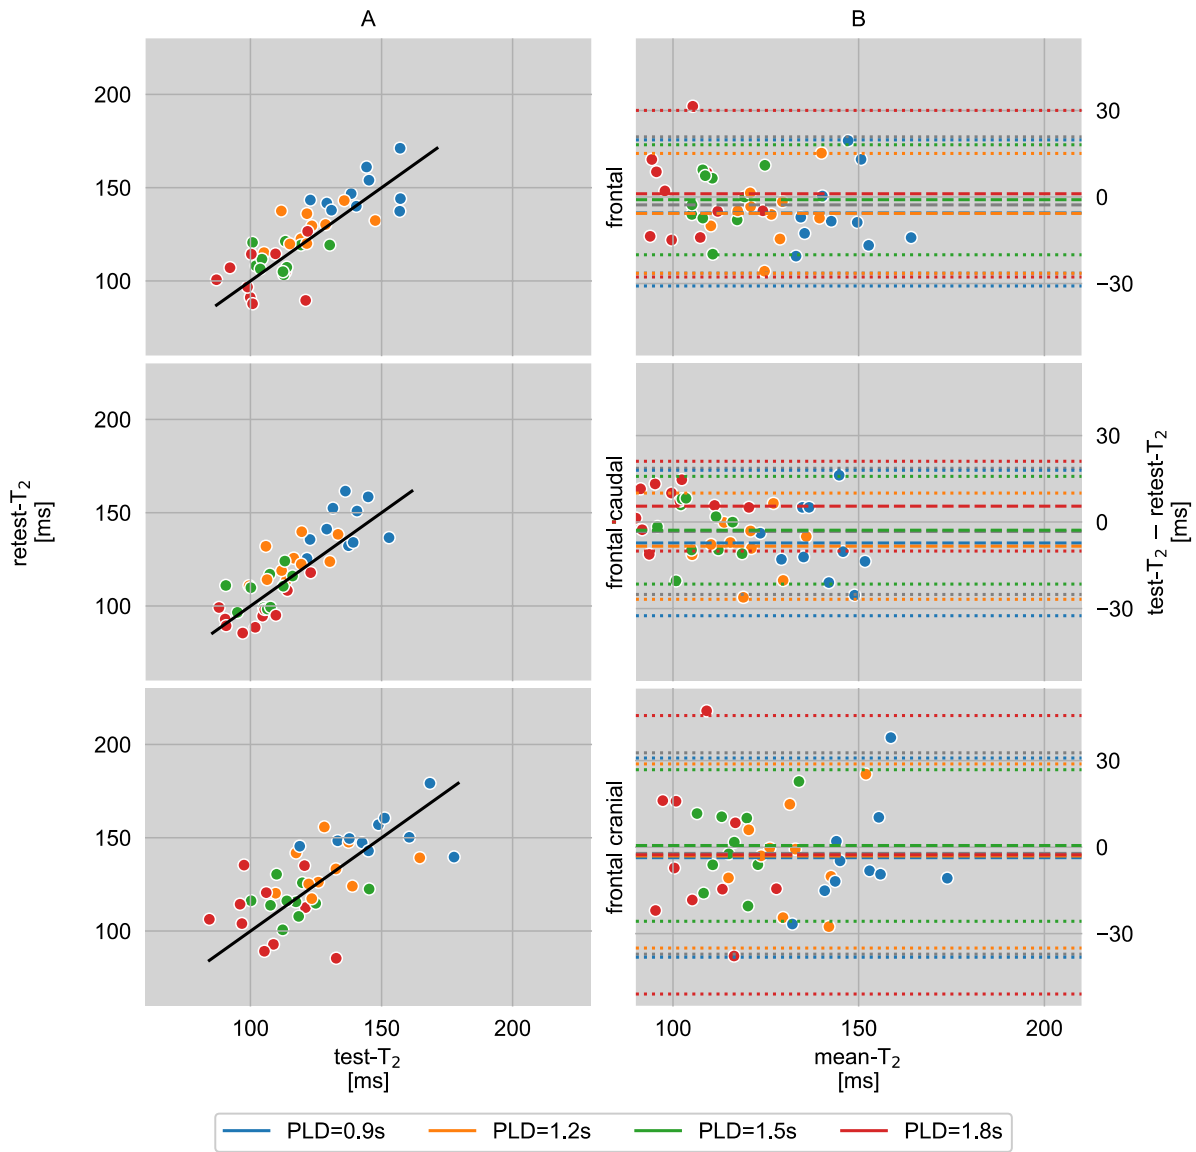

(A) Correlation of median  $T_2$  values from repeated measurements of ten subjects in frontal gray matter regions of interest (ROIs) at four postlabeling delays PLD=0.9/1.2/1.5/1.8 s. The subdivision of the frontal ROI into a cranial and a caudal segment is shown in Supplementary Figure S2E. The solid line is the identity function and represents optimal correlation. (B) Agreement (Bland-Altman plot) between test and retest  $T_2$  values which are shown in (A). The mean differences between both scans at each PLD are represented by the dashed lines and dotted lines display the corresponding limits of agreement ( $1.96 \times$  standard deviations of mean differences).

## Supplementary Figure S4

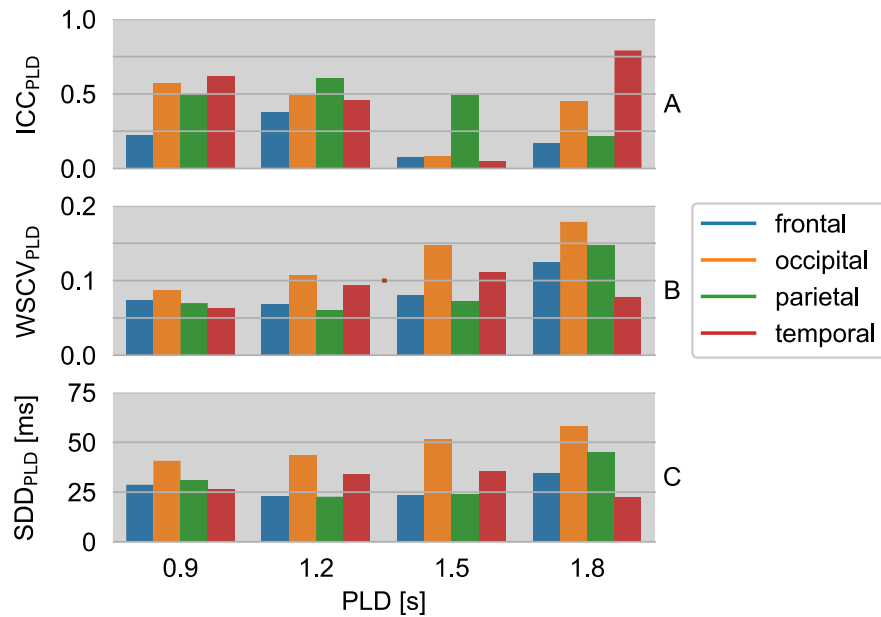

(A) Intraclass correlation coefficient  $ICC_{PLD}$ , (B) within-subject coefficient of variation  $WSCV_{PLD}$  and (C) smallest detectable difference  $SDD_{PLD}$  of median  $T_2$  values from repeated measurements of ten subjects based on a reduced  $T_2$  preparation time subset  $TE_{T_2Prep}=0/40/80/160$  ms. Results are shown for four postlabeling delays  $PLD=0.9/1.2/1.5/1.8$  s and four gray matter regions of interest (ROIs).
